# Supplementary material
Source: PubMed Central journal article supplement (PMC5698112)
Supplement: NIHMS911595-supplement-Supplemental_Data.pdf [file NIHMS911595-supplement-Supplemental_Data.pdf]

1 **SUPPLEMENTAL MATERIAL**

2 **SUPPLEMENTAL FIGURES**

3 **Supplemental Figure 1. A.** Action potential amplitude was not different in control and HFpEF  
4 cardiomyocytes. **B.** Representative recordings of  $I_{CaL}$  in control and HFpEF cardiomyocytes. **C.**  $I_{CaL}$  density  
5 was mildly elevated at 0 mV in HFpEF myocytes compared to controls (n=8 cardiomyocytes from 4-5 rats  
6 each group). **D.** Representative ECG and PES recordings before and after NS5806 in a HFpEF rat. **E.**  
7 NS5806 was able to shorten QTc interval but did not improve arrhythmogenicity. Error line indicates mean  
8 and standard deviation. \* denotes  $p < 0.05$  and \*\* denotes  $p < 0.001$ . Unpaired t-test was used for 1A and C  
9 and paired t-test was used for 1E.

10 **Supplemental Figure 2.** Western blots of Kv1.4, Kv11.1 and Kir2.1 showed no expression differences in  
11 the two groups. Error line indicates mean and standard deviation. Unpaired t-test was used for 2B, D, E.

12

13 **SUPPLEMENTAL VIDEOS**

14 **Supplemental Video 1** No induction of ventricular arrhythmia in a control rat.

15 **Supplemental Video 2** Induction of polymorphic VT in a HFpEF rat.

16 **Supplemental Video 3** Multiple re-entry circuits during PES in a HFpEF rat with optical mapping.

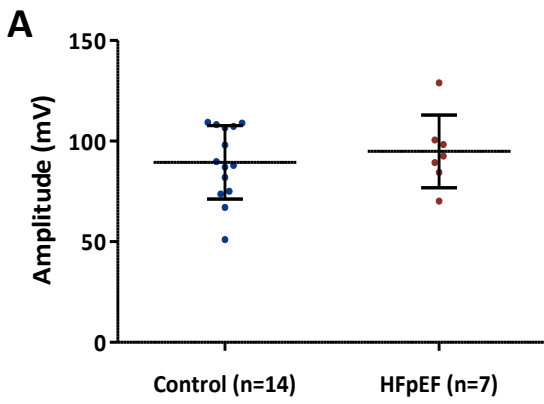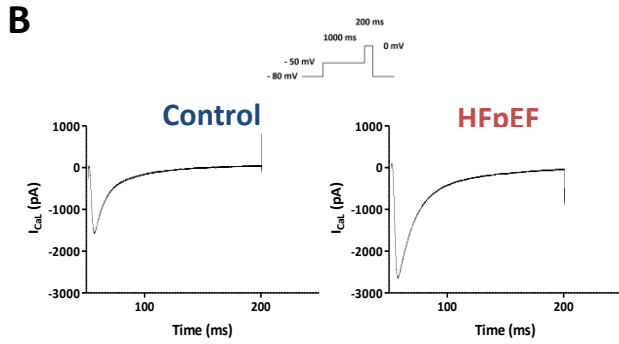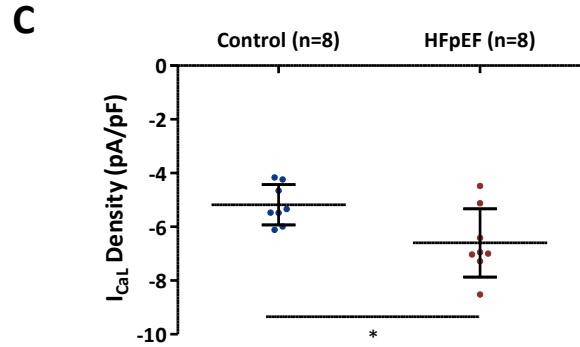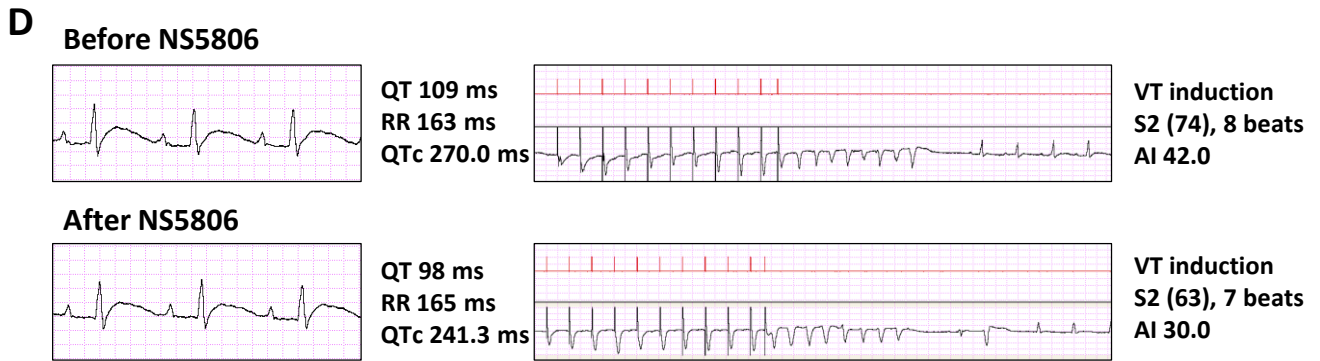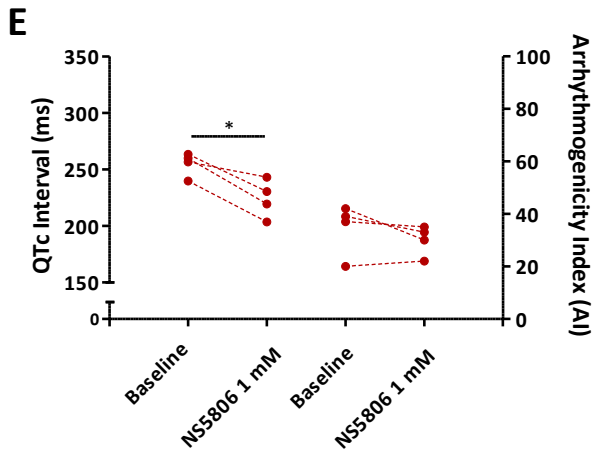

Supplemental Figure 1.

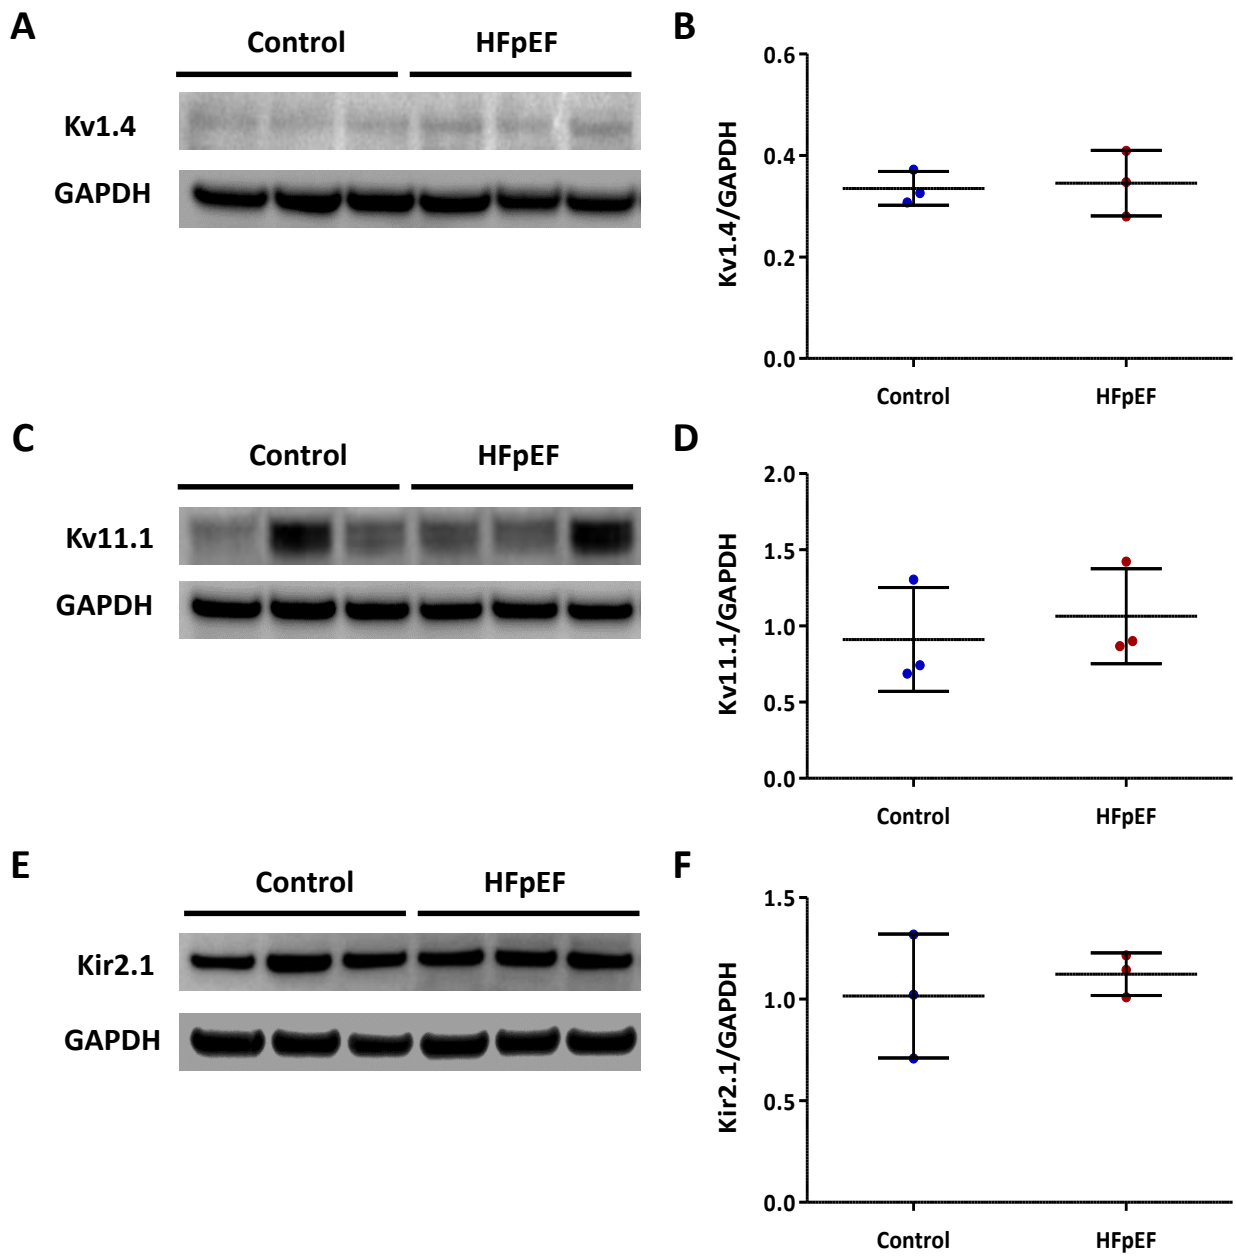

Supplemental Figure 2.
